# Supplementary material for: Secondary Market Monetization and Willingness to Share Personal Data
Source: Atypon-hosted journal article supplement (doi:10.1287/mnsc.2022.03423), 2025-01-31
Supplement: mnsc.2022.03423.sm1.pdf [file mnsc.2022.03423.sm1.pdf]

# Online Appendix: Secondary Market Monetization and Willingness to Share Personal Data

Joy Wu

Sauder School of Business, University of British Columbia

**Contact:** [joy.wu@sauder.ubc.ca](mailto:joy.wu@sauder.ubc.ca)

October 2024

---

## A. Additional Tables and Figures

Table A.1 Participation and Prices for Sharing Personal Data (All Samples).

|                                         | Logit                |                               |                                | OLS                            |                     |                               |
|-----------------------------------------|----------------------|-------------------------------|--------------------------------|--------------------------------|---------------------|-------------------------------|
|                                         | Participation        |                               |                                | Price (\$)   Participation = 1 |                     |                               |
|                                         | (1a)                 | (2a)                          | (3a)                           | (1b)                           | (2b)                | (3b)                          |
| <b>Conditions</b>                       |                      |                               |                                |                                |                     |                               |
| (Intercept)                             | 1.289***<br>(0.113)  | 1.455***<br>(0.138)           | 2.089***<br>(0.385)            | 1.499***<br>(0.061)            | 1.389***<br>(0.079) | 1.140***<br>(0.212)           |
| [30, <i>N</i> ]: 30 recipients, no info | -0.433***<br>(0.054) | -0.433***<br>(0.054)          | -0.441***<br>(0.055)           | 0.102***<br>(0.024)            | 0.102***<br>(0.024) | 0.102***<br>(0.024)           |
| [1, <i>F</i> ]: 1 recipient, full info  | -1.018***<br>(0.064) | -1.016***<br>(0.064)          | -1.039***<br>(0.065)           | 0.390***<br>(0.033)            | 0.393***<br>(0.033) | 0.392***<br>(0.033)           |
| <b>Order</b>                            |                      |                               |                                |                                |                     |                               |
| Decision $t = 2$                        | 0.110<br>(0.068)     | 0.109 <sup>†</sup><br>(0.065) | 0.114 <sup>†</sup><br>(0.066)  | 0.008<br>(0.031)               | 0.008<br>(0.031)    | 0.008<br>(0.031)              |
| Decision $t = 3$                        | -0.161*<br>(0.074)   | -0.160*<br>(0.074)            | -0.170*<br>(0.075)             | 0.006<br>(0.038)               | 0.022<br>(0.038)    | 0.023<br>(0.038)              |
| Decision $t = 4$                        | -0.197**<br>(0.074)  | -0.193**<br>(0.075)           | -0.203**<br>(0.076)            | -0.003<br>(0.039)              | 0.014<br>(0.040)    | 0.015<br>(0.040)              |
| <b>Sample</b>                           |                      |                               |                                |                                |                     |                               |
| Sample 2                                | 0.332**<br>(0.129)   | 0.335**<br>(0.129)            | 0.314*<br>(0.131)              | -0.051<br>(0.077)              | -0.048<br>(0.077)   | -0.036<br>(0.077)             |
| Sample 3                                | -0.015<br>(0.131)    | -0.014<br>(0.132)             | 0.001<br>(0.135)               | 0.000<br>(0.081)               | -0.002<br>(0.080)   | -0.010<br>(0.080)             |
| <b>Anchoring</b>                        |                      |                               |                                |                                |                     |                               |
| [1, <i>N</i> ] before [1, <i>F</i> ]    |                      | -0.369***<br>(0.108)          | -0.386***<br>(0.110)           |                                | 0.184**<br>(0.066)  | 0.196**<br>(0.066)            |
| [1, <i>N</i> ] before [30, <i>N</i> ]   |                      | 0.036<br>(0.109)              | 0.037<br>(0.110)               |                                | 0.020<br>(0.065)    | 0.027<br>(0.065)              |
| <b>Psychometric</b>                     |                      |                               |                                |                                |                     |                               |
| Extravert                               |                      |                               | 0.099<br>(0.110)               |                                |                     | 0.078<br>(0.066)              |
| Agreeable                               |                      |                               | -0.397 <sup>†</sup><br>(0.235) |                                |                     | 0.228 <sup>†</sup><br>(0.127) |
| Conscientious                           |                      |                               | -0.571***<br>(0.158)           |                                |                     | 0.135 <sup>†</sup><br>(0.082) |
| Emotionally stable                      |                      |                               | 0.137<br>(0.113)               |                                |                     | -0.104<br>(0.067)             |
| Intellectual                            |                      |                               | -0.159<br>(0.162)              |                                |                     | 0.031<br>(0.093)              |
| <b>Demographic</b>                      |                      |                               |                                |                                |                     |                               |
| Female                                  |                      |                               | -0.127<br>(0.128)              |                                |                     | -0.076<br>(0.074)             |
| Single                                  |                      |                               | 0.449**<br>(0.169)             |                                |                     | -0.032<br>(0.110)             |
| Employed                                |                      |                               | -0.214<br>(0.132)              |                                |                     | -0.091<br>(0.081)             |
| Facebook User                           |                      |                               | 0.150<br>(0.143)               |                                |                     | 0.009<br>(0.083)              |
| Individual clusters                     | 1188                 | 1188                          | 1188                           | 975                            | 975                 | 975                           |
| Observations                            | 3564                 | 3564                          | 3564                           | 2472                           | 2472                | 2472                          |
| <b>Wald Test</b>                        |                      |                               |                                |                                |                     |                               |
| $Pr(> \chi^2)$                          | (1a),(2a)            | (2a),(3a)                     | (1a),(3a)                      | (1b),(2b)                      | (2b),(3b)           | (1b),(3b)                     |
|                                         | 0.003                | 0.000                         | 0.000                          | 0.020                          | 0.186               | 0.041                         |

Notes: The omitted category for conditions is [1, *N*]: 1 recipient, no info; order is  $t = 1$ ; sample is Sample 1; anchoring is the reverse order; and psychometric traits are low scores (below 30). Clustered robust standard errors are in parentheses. <sup>†</sup> $p < 0.1$ ; \* $p < 0.05$ ; \*\* $p < 0.01$ ; and \*\*\* $p < 0.001$ .

**Table A.2 Participation and Prices for Sharing Personal Data (Sample 1).**

|                                           | Logit                |                      |                               | OLS                 |                               |                                |
|-------------------------------------------|----------------------|----------------------|-------------------------------|---------------------|-------------------------------|--------------------------------|
|                                           | Participation        |                      |                               | Price (\$)          | Participation = 1             |                                |
|                                           | (1a)                 | (2a)                 | (3a)                          | (1b)                | (2b)                          | (3b)                           |
| <b>Conditions</b>                         |                      |                      |                               |                     |                               |                                |
| (Intercept)                               | 1.317***<br>(0.138)  | 1.585***<br>(0.188)  | 1.176*<br>(0.580)             | 1.472***<br>(0.070) | 1.341***<br>(0.101)           | 1.468***<br>(0.330)            |
| [30, <i>N</i> ]: 30 recipients, no info   | -0.425***<br>(0.083) | -0.428***<br>(0.084) | -0.441***<br>(0.086)          | 0.092*<br>(0.039)   | 0.091*<br>(0.039)             | 0.090*<br>(0.039)              |
| [1, <i>P</i> ]: 1 recipient, partial info | -0.682***<br>(0.097) | -0.681***<br>(0.097) | -0.701***<br>(0.100)          | 0.252***<br>(0.050) | 0.252***<br>(0.050)           | 0.252***<br>(0.050)            |
| [1, <i>F</i> ]: 1 recipient, full info    | -1.046***<br>(0.108) | -1.050***<br>(0.108) | -1.082***<br>(0.111)          | 0.428***<br>(0.058) | 0.429***<br>(0.058)           | 0.427***<br>(0.058)            |
| <b>Order</b>                              |                      |                      |                               |                     |                               |                                |
| Decision <i>t</i> = 2                     | 0.080<br>(0.075)     | 0.079<br>(0.075)     | 0.084<br>(0.077)              | 0.032<br>(0.042)    | 0.032<br>(0.042)              | 0.031<br>(0.042)               |
| Decision <i>t</i> = 3                     | -0.142<br>(0.095)    | -0.124<br>(0.095)    | -0.127<br>(0.098)             | 0.071<br>(0.054)    | 0.074<br>(0.054)              | 0.074<br>(0.054)               |
| Decision <i>t</i> = 4                     | -0.243*<br>(0.100)   | -0.235*<br>(0.101)   | -0.242*<br>(0.103)            | 0.039<br>(0.054)    | 0.044<br>(0.055)              | 0.043<br>(0.055)               |
| <b>Anchoring</b>                          |                      |                      |                               |                     |                               |                                |
| [1, <i>N</i> ] before [1, <i>F</i> ]      |                      | -0.238<br>(0.180)    | -0.273<br>(0.182)             |                     | 0.197 <sup>†</sup><br>(0.107) | 0.192 <sup>†</sup><br>(0.105)  |
| [1, <i>P</i> ] before [1, <i>F</i> ]      |                      | -0.289<br>(0.178)    | -0.263<br>(0.180)             |                     | 0.061<br>(0.106)              | 0.078<br>(0.105)               |
| <b>Psychometric</b>                       |                      |                      |                               |                     |                               |                                |
| Extravert                                 |                      |                      | -0.190<br>(0.184)             |                     |                               | 0.221*<br>(0.107)              |
| Agreeable                                 |                      |                      | -0.206<br>(0.357)             |                     |                               | -0.037<br>(0.188)              |
| Conscientious                             |                      |                      | -0.422<br>(0.266)             |                     |                               | 0.136<br>(0.145)               |
| Emotionally stable                        |                      |                      | 0.327 <sup>†</sup><br>(0.190) |                     |                               | -0.065<br>(0.110)              |
| Intellectual                              |                      |                      | 0.405<br>(0.266)              |                     |                               | -0.064<br>(0.179)              |
| <b>Demographic</b>                        |                      |                      |                               |                     |                               |                                |
| Female                                    |                      |                      | -0.098<br>(0.217)             |                     |                               | -0.081<br>(0.120)              |
| Single                                    |                      |                      | 0.658*<br>(0.277)             |                     |                               | -0.083<br>(0.170)              |
| Employed                                  |                      |                      | -0.006<br>(0.224)             |                     |                               | -0.223 <sup>†</sup><br>(0.135) |
| Facebook User                             |                      |                      | 0.390 <sup>†</sup><br>(0.227) |                     |                               | -0.222 <sup>†</sup><br>(0.133) |
| Individual clusters                       | 413                  | 413                  | 413                           | 334                 | 334                           | 334                            |
| Observations                              | 1652                 | 1652                 | 1652                          | 1094                | 1094                          | 1094                           |
| <b>Wald Test</b>                          | (1a),(2a)            | (2a),(3a)            | (1a),(3a)                     | (1b),(2b)           | (2b),(3b)                     | (1b),(3b)                      |
| <i>Pr</i> ( $> \chi^2$ )                  | 0.096                | 0.062                | 0.034                         | 0.132               | 0.099                         | 0.062                          |

*Notes:* The omitted category for conditions is [1, *N*]: 1 recipient, no info; order is *t* = 1; anchoring is the reverse order; and psychometric traits are low scores (below 30). [1, *P*] before [1, *F*] subjects are in the same randomization group as [30, *N*] before [1, *N*]. Clustered robust standard errors are in parentheses. <sup>†</sup>*p* < 0.1; \**p* < 0.05; \*\**p* < 0.01; and \*\*\**p* < 0.001.

**Table A.3 Participation and Prices for Sharing Personal Data (Sample 2).**

|                                           | Logit                |                      |                                | OLS                            |                               |                               |
|-------------------------------------------|----------------------|----------------------|--------------------------------|--------------------------------|-------------------------------|-------------------------------|
|                                           | Participation        |                      |                                | Price (\$)   Participation = 1 |                               |                               |
|                                           | (1a)                 | (2a)                 | (3a)                           | (1b)                           | (2b)                          | (3b)                          |
| <b>Conditions</b>                         |                      |                      |                                |                                |                               |                               |
| (Intercept)                               | 1.554***<br>(0.149)  | 2.028***<br>(0.204)  | 4.034***<br>(0.659)            | 1.412***<br>(0.064)            | 1.310***<br>(0.104)           | 0.606*<br>(0.301)             |
| [30, <i>N</i> ]: 30 recipients, no info   | -0.395***<br>(0.098) | -0.407***<br>(0.102) | -0.426***<br>(0.106)           | 0.069 <sup>†</sup><br>(0.036)  | 0.069 <sup>†</sup><br>(0.036) | 0.070 <sup>†</sup><br>(0.036) |
| [1, <i>F</i> ]: 1 recipient, full info    | -1.007***<br>(0.115) | -1.021***<br>(0.115) | -1.081***<br>(0.120)           | 0.430***<br>(0.052)            | 0.432***<br>(0.052)           | 0.432***<br>(0.052)           |
| [30, <i>F</i> ]: 30 recipients, full info | -1.079***<br>(0.118) | -1.099***<br>(0.120) | -1.166***<br>(0.125)           | 0.395***<br>(0.053)            | 0.397***<br>(0.053)           | 0.397***<br>(0.052)           |
| <b>Order</b>                              |                      |                      |                                |                                |                               |                               |
| Decision <i>t</i> = 2                     | 0.218**<br>(0.083)   | 0.226**<br>(0.083)   | 0.238**<br>(0.088)             | 0.029<br>(0.034)               | 0.029<br>(0.034)              | 0.029<br>(0.034)              |
| Decision <i>t</i> = 3                     | -0.115<br>(0.106)    | -0.053<br>(0.107)    | -0.075<br>(0.112)              | 0.091 <sup>†</sup><br>(0.051)  | 0.095 <sup>†</sup><br>(0.052) | 0.097 <sup>†</sup><br>(0.052) |
| Decision <i>t</i> = 4                     | -0.147<br>(0.106)    | -0.078<br>(0.108)    | -0.102<br>(0.113)              | 0.053<br>(0.055)               | 0.058<br>(0.056)              | 0.059<br>(0.056)              |
| <b>Anchoring effects</b>                  |                      |                      |                                |                                |                               |                               |
| [1, <i>N</i> ] before [1, <i>F</i> ]      |                      | -0.665***<br>(0.190) | -0.673***<br>(0.195)           |                                | 0.166<br>(0.110)              | 0.175<br>(0.109)              |
| [30, <i>F</i> ] before [1, <i>F</i> ]     |                      | -0.282<br>(0.189)    | -0.363 <sup>†</sup><br>(0.195) |                                | 0.042<br>(0.108)              | 0.051<br>(0.107)              |
| <b>Psychometric</b>                       |                      |                      |                                |                                |                               |                               |
| Extravert                                 |                      |                      | 0.316<br>(0.195)               |                                |                               | -0.085<br>(0.110)             |
| Agreeable                                 |                      |                      | -1.104*<br>(0.475)             |                                |                               | 0.557**<br>(0.188)            |
| Conscientious                             |                      |                      | -1.048***<br>(0.280)           |                                |                               | 0.163<br>(0.123)              |
| Emotionally stable                        |                      |                      | -0.031<br>(0.196)              |                                |                               | -0.047<br>(0.109)             |
| Intellectual                              |                      |                      | -0.451<br>(0.280)              |                                |                               | 0.096<br>(0.139)              |
| <b>Demographic</b>                        |                      |                      |                                |                                |                               |                               |
| Female                                    |                      |                      | -0.012<br>(0.229)              |                                |                               | -0.113<br>(0.126)             |
| Single                                    |                      |                      | 0.354<br>(0.293)               |                                |                               | 0.108<br>(0.184)              |
| Employed                                  |                      |                      | -0.300<br>(0.240)              |                                |                               | 0.025<br>(0.138)              |
| Facebook User                             |                      |                      | 0.041<br>(0.258)               |                                |                               | 0.149<br>(0.139)              |
| Individual clusters                       | 420                  | 420                  | 420                            | 359                            | 359                           | 359                           |
| Observations                              | 1680                 | 1680                 | 1680                           | 1186                           | 1186                          | 1186                          |
| <b>Wald Test</b>                          | (1a),(2a)            | (2a),(3a)            | (1a),(3a)                      | (1b),(2b)                      | (2b),(3b)                     | (1b),(3b)                     |
| <i>Pr</i> ( $> \chi^2$ )                  | 0.001                | 0.000                | 0.000                          | 0.302                          | 0.148                         | 0.136                         |

Notes: The omitted category for conditions is [1, *N*]: 1 recipient, no info; order is *t* = 1; anchoring is the reverse order; and psychometric traits are low scores (below 30). [30, *F*] before [1, *F*] subjects are in the same randomization group as [30, *N*] before [1, *N*]. Clustered robust standard errors are in parentheses. <sup>†</sup>*p* < 0.1; \**p* < 0.05; \*\**p* < 0.01; and \*\*\**p* < 0.001.

**Table A.4 Participation and Prices for Sharing Personal Data (Sample 3).**

|                                         | Logit                |                      |                      | OLS                              |                     |                     |
|-----------------------------------------|----------------------|----------------------|----------------------|----------------------------------|---------------------|---------------------|
|                                         | Participation        |                      |                      | Price(\$)<br>  Participation = 1 |                     |                     |
|                                         | (1a)                 | (2a)                 | (3a)                 | (1b)                             | (2b)                | (3b)                |
| <b>Conditions</b>                       |                      |                      |                      |                                  |                     |                     |
| (Intercept)                             | 1.284***<br>(0.144)  | 1.406***<br>(0.200)  | 2.063**<br>(0.757)   | 1.551***<br>(0.071)              | 1.487***<br>(0.108) | 1.439***<br>(0.426) |
| [30, $N$ ]: 30 recipients, no info      | -0.484***<br>(0.102) | -0.483***<br>(0.102) | -0.492***<br>(0.103) | 0.168***<br>(0.048)              | 0.168***<br>(0.048) | 0.168***<br>(0.048) |
| [1, $F'$ ]: 1 recipient, alt. full info | -0.789***<br>(0.103) | -0.785***<br>(0.102) | -0.800***<br>(0.104) | 0.390***<br>(0.057)              | 0.392***<br>(0.057) | 0.391***<br>(0.057) |
| [1, $F$ ]: 1 recipient, full info       | -0.998***<br>(0.113) | -0.996***<br>(0.113) | -1.016***<br>(0.114) | 0.362***<br>(0.062)              | 0.364***<br>(0.062) | 0.362***<br>(0.062) |
| <b>Order</b>                            |                      |                      |                      |                                  |                     |                     |
| Decision $t = 2$                        | 0.133<br>(0.095)     | 0.131<br>(0.094)     | 0.135<br>(0.096)     | -0.086*<br>(0.043)               | -0.087*<br>(0.043)  | -0.088*<br>(0.043)  |
| Decision $t = 3$                        | -0.157<br>(0.105)    | -0.147<br>(0.105)    | -0.149<br>(0.106)    | -0.043<br>(0.059)                | -0.038<br>(0.059)   | -0.038<br>(0.059)   |
| Decision $t = 4$                        | -0.232*<br>(0.107)   | -0.225*<br>(0.107)   | -0.231*<br>(0.108)   | -0.120*<br>(0.061)               | -0.115†<br>(0.061)  | -0.116†<br>(0.061)  |
| <b>Anchoring effects</b>                |                      |                      |                      |                                  |                     |                     |
| [1, $N$ ] before [1, $F$ ]              |                      | -0.173<br>(0.191)    | -0.179<br>(0.194)    |                                  | 0.241*<br>(0.118)   | 0.241*<br>(0.118)   |
| [1, $F'$ ] before [1, $F$ ]             |                      | -0.080<br>(0.192)    | -0.158<br>(0.194)    |                                  | -0.123<br>(0.117)   | -0.139<br>(0.118)   |
| <b>Psychometric</b>                     |                      |                      |                      |                                  |                     |                     |
| Extravert                               |                      |                      | 0.118<br>(0.200)     |                                  |                     | 0.139<br>(0.116)    |
| Agreeable                               |                      |                      | 0.007<br>(0.500)     |                                  |                     | 0.056<br>(0.291)    |
| Conscientious                           |                      |                      | -0.295<br>(0.286)    |                                  |                     | 0.033<br>(0.155)    |
| Emotionally stable                      |                      |                      | 0.129<br>(0.207)     |                                  |                     | -0.247*<br>(0.122)  |
| Intellectual                            |                      |                      | -0.259<br>(0.278)    |                                  |                     | 0.065<br>(0.169)    |
| <b>Demographic</b>                      |                      |                      |                      |                                  |                     |                     |
| Female                                  |                      |                      | -0.426†<br>(0.229)   |                                  |                     | -0.050<br>(0.127)   |
| Single                                  |                      |                      | 0.187<br>(0.325)     |                                  |                     | -0.015<br>(0.194)   |
| Employed                                |                      |                      | -0.366<br>(0.226)    |                                  |                     | -0.102<br>(0.138)   |
| Facebook User                           |                      |                      | -0.069<br>(0.269)    |                                  |                     | 0.241<br>(0.164)    |
| Individual clusters                     | 355                  | 355                  | 355                  | 286                              | 286                 | 286                 |
| Observations                            | 1420                 | 1420                 | 1420                 | 926                              | 926                 | 926                 |
| <b>Wald Test</b>                        | (1a),(2a)            | (2a),(3a)            | (1a),(3a)            | (1b),(2b)                        | (2b),(3b)           | (1b),(3b)           |
| $Pr(> \chi^2)$                          | 0.604                | 0.411                | 0.466                | 0.073                            | 0.527               | 0.205               |

Notes: The omitted category for conditions is [1,  $N$ ]: 1 recipient, no info; order is  $t = 1$ ; anchoring is the reverse order; and psychometric traits are low scores (below 30). [1,  $F'$ ] before [1,  $F$ ] subjects are in the same randomization group as [30,  $N$ ] before [1,  $N$ ]. Clustered robust standard errors are in parentheses. † $p < 0.1$ ; \* $p < 0.05$ ; \*\* $p < 0.01$ ; and \*\*\* $p < 0.001$ .

**Table A.5 Participation and Prices Between-Subjects Comparison for Sharing Personal Data by Decision Period.**

|                                           | Logit<br>Participation         |                                |                                | OLS<br>Price (\$)   Participation = 1 |                     |                     |
|-------------------------------------------|--------------------------------|--------------------------------|--------------------------------|---------------------------------------|---------------------|---------------------|
|                                           | (1a)                           | (2a)                           | (3a)                           | (1b)                                  | (2b)                | (3b)                |
| <b>Decision Period <math>t = 1</math></b> |                                |                                |                                |                                       |                     |                     |
| (Intercept)                               | 1.121***<br>(0.135)            | 1.108***<br>(0.168)            | 1.567**<br>(0.493)             | 1.560***<br>(0.071)                   | 1.583***<br>(0.093) | 1.533***<br>(0.277) |
| [30, $N$ ]: 30 recipients, no info        | -0.331 <sup>†</sup><br>(0.184) | -0.331 <sup>†</sup><br>(0.184) | -0.343 <sup>†</sup><br>(0.188) | -0.021<br>(0.103)                     | -0.020<br>(0.103)   | -0.044<br>(0.104)   |
| [1, $F$ ]: 1 recipient, full info         | -0.458*<br>(0.182)             | -0.458*<br>(0.182)             | -0.451*<br>(0.185)             | 0.030<br>(0.104)                      | 0.030<br>(0.104)    | 0.011<br>(0.105)    |
| Observations                              | 892                            | 892                            | 892                            | 625                                   | 625                 | 625                 |
| <b>Decision Period <math>t = 2</math></b> |                                |                                |                                |                                       |                     |                     |
| (Intercept)                               | 1.399***<br>(0.145)            | 1.244***<br>(0.175)            | 1.687***<br>(0.508)            | 1.531***<br>(0.069)                   | 1.574***<br>(0.092) | 1.107***<br>(0.273) |
| [30, $N$ ]: 30 recipients, no info        | -0.501**<br>(0.194)            | -0.505**<br>(0.194)            | -0.489*<br>(0.198)             | 0.094<br>(0.101)                      | 0.093<br>(0.101)    | 0.108<br>(0.102)    |
| [1, $F$ ]: 1 recipient, full info         | -0.815***<br>(0.189)           | -0.824***<br>(0.190)           | -0.813***<br>(0.193)           | 0.119<br>(0.104)                      | 0.127<br>(0.104)    | 0.110<br>(0.105)    |
| Observations                              | 891                            | 891                            | 891                            | 640                                   | 640                 | 640                 |
| <b>Decision Period <math>t = 3</math></b> |                                |                                |                                |                                       |                     |                     |
| (Intercept)                               | 1.416***<br>(0.146)            | 1.339***<br>(0.177)            | 2.187***<br>(0.522)            | 1.421***<br>(0.070)                   | 1.444***<br>(0.093) | 1.320***<br>(0.274) |
| [30, $N$ ]: 30 recipients, no info        | -0.457*<br>(0.196)             | -0.461*<br>(0.196)             | -0.477*<br>(0.200)             | -0.066<br>(0.103)                     | -0.066<br>(0.103)   | -0.081<br>(0.103)   |
| [1, $F$ ]: 1 recipient, full info         | -1.369***<br>(0.187)           | -1.376***<br>(0.187)           | -1.456***<br>(0.192)           | 0.404***<br>(0.113)                   | 0.406***<br>(0.113) | 0.397***<br>(0.114) |
| Observations                              | 890                            | 890                            | 890                            | 605                                   | 605                 | 605                 |
| <b>Decision Period <math>t = 4</math></b> |                                |                                |                                |                                       |                     |                     |
| (Intercept)                               | 1.412***<br>(0.146)            | 1.243***<br>(0.176)            | 1.679***<br>(0.498)            | 1.387***<br>(0.072)                   | 1.404***<br>(0.097) | 1.011***<br>(0.292) |
| [30, $N$ ]: 30 recipients, no info        | -0.448*<br>(0.196)             | -0.449*<br>(0.197)             | -0.443*<br>(0.199)             | 0.026<br>(0.105)                      | 0.026<br>(0.105)    | 0.035<br>(0.105)    |
| [1, $F$ ]: 1 recipient, full info         | -1.412***<br>(0.187)           | -1.427***<br>(0.188)           | -1.449***<br>(0.192)           | 0.361**<br>(0.116)                    | 0.362**<br>(0.117)  | 0.387**<br>(0.117)  |
| Observations                              | 891                            | 891                            | 891                            | 602                                   | 602                 | 602                 |
| Sample controls                           |                                | ×                              | ×                              |                                       | ×                   | ×                   |
| Psychometric controls                     |                                |                                | ×                              |                                       |                     | ×                   |
| Demographic controls                      |                                |                                | ×                              |                                       |                     | ×                   |

Notes: The omitted category is [1,  $N$ ]: 1 recipient, no info. Standard errors in parentheses. <sup>†</sup> $p < 0.1$ ; \* $p < 0.05$ ; \*\* $p < 0.01$ ; and \*\*\* $p < 0.001$ .

Figure A.1 Item Score Correlations for Five Factor Traits.

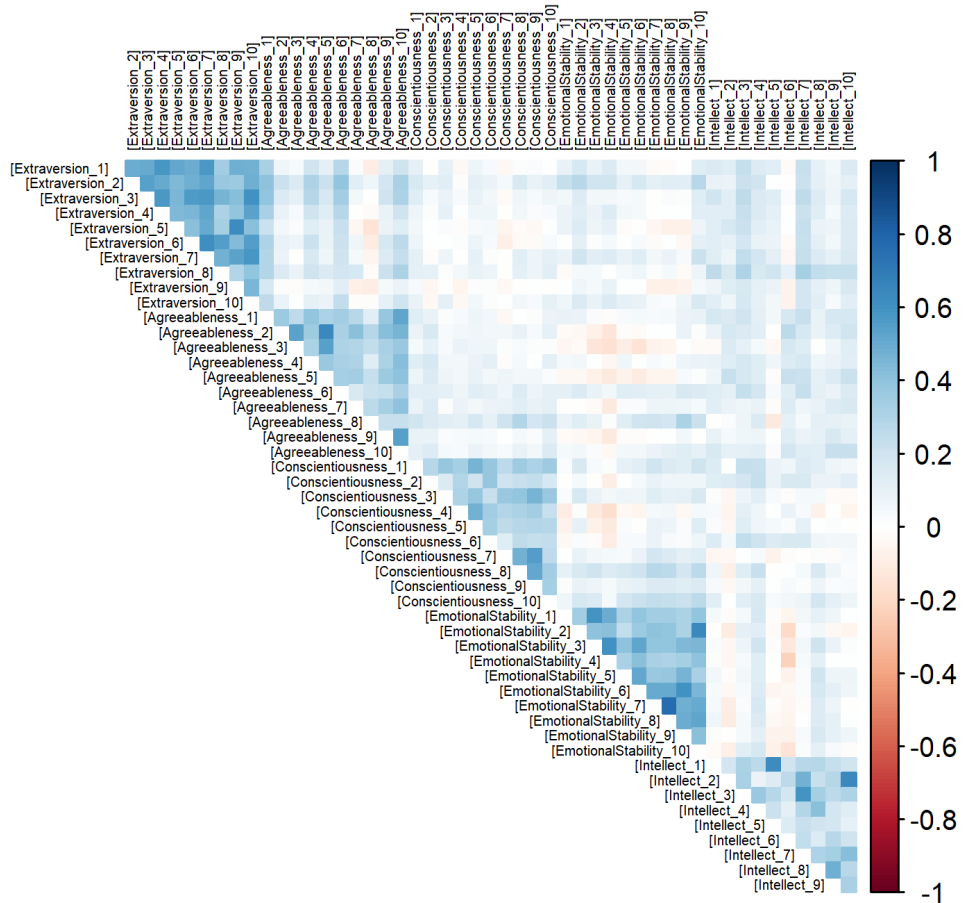

Table A.6 Factor Loadings and Reliability for Five Factor Traits.

|                       | Factor 1     | Factor 2     | Factor 3     | Factor 4     | Factor 5     | Factor 6     | Factor 7     | Factor 8     |
|-----------------------|--------------|--------------|--------------|--------------|--------------|--------------|--------------|--------------|
| Extraversion_1        | <b>0.684</b> | 0.010        | -0.014       | 0.096        | -0.088       | 0.020        | 0.020        | 0.082        |
| Extraversion_2        | <b>0.607</b> | 0.229        | 0.050        | 0.173        | 0.017        | -0.040       | -0.059       | 0.115        |
| Extraversion_3        | <b>0.725</b> | 0.124        | -0.006       | -0.039       | 0.010        | -0.018       | 0.064        | 0.025        |
| Extraversion_4        | <b>0.664</b> | 0.033        | 0.012        | 0.080        | -0.077       | 0.010        | 0.010        | 0.072        |
| Extraversion_5        | <b>0.630</b> | -0.062       | -0.050       | 0.063        | -0.109       | 0.106        | -0.025       | 0.106        |
| Extraversion_6        | <b>0.763</b> | 0.025        | -0.071       | -0.149       | 0.080        | 0.003        | 0.006        | -0.038       |
| Extraversion_7        | <b>0.805</b> | -0.048       | 0.054        | -0.010       | 0.067        | 0.014        | 0.018        | -0.068       |
| Extraversion_8        | <b>0.516</b> | 0.081        | 0.050        | -0.137       | 0.090        | 0.120        | 0.195        | -0.117       |
| Extraversion_9        | <b>0.657</b> | -0.138       | 0.012        | 0.025        | -0.121       | 0.114        | -0.054       | -0.026       |
| Extraversion_10       | <b>0.744</b> | -0.023       | 0.044        | 0.022        | 0.007        | -0.013       | -0.028       | -0.064       |
| Agreeableness_1       | 0.295        | <b>0.495</b> | -0.077       | 0.005        | 0.039        | -0.018       | 0.090        | 0.005        |
| Agreeableness_2       | -0.059       | <b>0.757</b> | 0.009        | -0.011       | -0.034       | 0.076        | -0.033       | 0.009        |
| Agreeableness_3       | -0.086       | <b>0.654</b> | -0.039       | -0.042       | -0.080       | 0.053        | -0.122       | 0.141        |
| Agreeableness_4       | 0.114        | <b>0.522</b> | -0.051       | 0.017        | 0.007        | -0.032       | 0.069        | 0.123        |
| Agreeableness_5       | -0.039       | <b>0.694</b> | 0.019        | 0.026        | -0.127       | 0.135        | -0.077       | 0.096        |
| Agreeableness_6       | 0.197        | <b>0.402</b> | 0.026        | 0.118        | 0.033        | 0.031        | 0.013        | 0.168        |
| Agreeableness_7       | -0.078       | <b>0.531</b> | 0.080        | -0.068       | 0.079        | 0.002        | 0.067        | -0.137       |
| Agreeableness_8       | -0.195       | <b>0.374</b> | 0.241        | 0.091        | 0.138        | 0.058        | -0.082       | 0.002        |
| Agreeableness_9       | 0.087        | <b>0.603</b> | 0.014        | -0.064       | 0.002        | -0.096       | 0.083        | -0.169       |
| Agreeableness_10      | 0.182        | <b>0.665</b> | 0.008        | -0.035       | 0.102        | -0.052       | 0.090        | -0.169       |
| Conscientiousness_1   | 0.051        | 0.027        | <b>0.439</b> | -0.091       | 0.132        | -0.009       | 0.129        | 0.268        |
| Conscientiousness_2   | -0.109       | 0.138        | 0.280        | -0.083       | 0.051        | 0.118        | 0.121        | 0.201        |
| Conscientiousness_3   | 0.060        | -0.010       | <b>0.601</b> | 0.054        | -0.071       | -0.069       | -0.003       | 0.128        |
| Conscientiousness_4   | -0.016       | 0.007        | <b>0.456</b> | -0.286       | 0.067        | -0.073       | 0.029        | 0.263        |
| Conscientiousness_5   | 0.083        | 0.008        | <b>0.431</b> | -0.235       | 0.095        | -0.057       | 0.007        | <b>0.315</b> |
| Conscientiousness_6   | -0.043       | 0.007        | <b>0.311</b> | -0.126       | 0.044        | 0.041        | 0.182        | <b>0.317</b> |
| Conscientiousness_7   | -0.038       | -0.010       | <b>0.680</b> | 0.006        | -0.017       | 0.044        | -0.135       | -0.086       |
| Conscientiousness_8   | 0.000        | 0.037        | 0.672        | <b>0.125</b> | 0.046        | -0.028       | 0.041        | -0.033       |
| Conscientiousness_9   | 0.017        | -0.031       | <b>0.778</b> | 0.028        | -0.062       | 0.012        | -0.015       | -0.110       |
| Conscientiousness_10  | 0.018        | 0.050        | <b>0.438</b> | 0.005        | 0.170        | 0.015        | 0.101        | 0.002        |
| EmotionalStability_1  | -0.034       | 0.066        | -0.063       | <b>0.639</b> | 0.090        | -0.034       | 0.042        | 0.073        |
| EmotionalStability_2  | 0.157        | -0.005       | 0.009        | 0.344        | <b>0.308</b> | -0.116       | -0.077       | 0.262        |
| EmotionalStability_3  | -0.017       | -0.018       | 0.061        | <b>0.762</b> | 0.079        | 0.000        | 0.052        | -0.038       |
| EmotionalStability_4  | 0.077        | -0.108       | 0.013        | <b>0.719</b> | 0.004        | -0.024       | -0.005       | -0.014       |
| EmotionalStability_5  | -0.001       | -0.013       | 0.067        | <b>0.328</b> | 0.297        | 0.053        | 0.038        | -0.103       |
| EmotionalStability_6  | 0.019        | -0.037       | 0.056        | <b>0.374</b> | <b>0.436</b> | 0.066        | -0.013       | -0.110       |
| EmotionalStability_7  | -0.036       | -0.027       | 0.009        | 0.028        | <b>0.828</b> | -0.005       | -0.004       | 0.023        |
| EmotionalStability_8  | -0.011       | -0.028       | -0.024       | -0.018       | <b>0.887</b> | 0.005        | -0.005       | -0.008       |
| EmotionalStability_9  | -0.089       | 0.120        | 0.071        | <b>0.328</b> | <b>0.421</b> | 0.074        | -0.056       | -0.078       |
| EmotionalStability_10 | 0.130        | 0.032        | 0.066        | <b>0.318</b> | <b>0.439</b> | -0.053       | -0.109       | 0.200        |
| Intellect_1           | 0.005        | 0.035        | -0.014       | 0.025        | 0.007        | 0.011        | <b>0.757</b> | -0.040       |
| Intellect_2           | 0.000        | 0.007        | -0.061       | -0.031       | -0.041       | <b>0.785</b> | -0.052       | 0.025        |
| Intellect_3           | 0.097        | 0.012        | 0.027        | 0.054        | 0.015        | <b>0.387</b> | 0.285        | <b>0.337</b> |
| Intellect_4           | 0.012        | 0.081        | 0.119        | 0.206        | 0.027        | 0.106        | <b>0.329</b> | 0.151        |
| Intellect_5           | -0.007       | -0.085       | -0.038       | 0.016        | -0.082       | -0.032       | <b>0.737</b> | 0.041        |
| Intellect_6           | -0.160       | 0.228        | 0.008        | -0.152       | 0.000        | 0.255        | 0.195        | 0.012        |
| Intellect_7           | 0.114        | 0.017        | -0.023       | 0.028        | 0.003        | <b>0.563</b> | 0.171        | 0.241        |
| Intellect_8           | 0.012        | 0.016        | 0.098        | 0.175        | 0.063        | <b>0.309</b> | <b>0.321</b> | -0.132       |
| Intellect_9           | -0.047       | 0.098        | 0.027        | 0.028        | 0.097        | <b>0.376</b> | 0.250        | -0.157       |
| Intellect_10          | 0.072        | 0.044        | 0.043        | -0.029       | 0.046        | <b>0.739</b> | -0.047       | -0.128       |
| Cronbach's alpha      | 0.903        | 0.833        | 0.824        | 0.883        | 0.883        | 0.794        | 0.794        | 0.824        |

Notes: Eight factors are selected for factor analysis based on a scree plot checked against a parallel analysis, and oblique rotations were used. Factor loadings of  $> 0.3$  in absolute value are indicated in bold font. To compute Cronbach's alpha, the trait with the greatest number of items with loadings  $> 0.3$  in absolute value was selected—i.e., all items from Extraversion for Factor 1, Agreeableness for Factor 2, Conscientiousness for Factors 3 and 8, Emotional Stability for Factors 4 and 5, and Intellect for Factors 6 and 7.

**Table A.7 Price Choices by Condition.**

| Condition                               | Sample      | No. of<br>Individuals | Min.<br>WTA (\$) | Count | Proportion | 99% CI         |
|-----------------------------------------|-------------|-----------------------|------------------|-------|------------|----------------|
| [1, $N$ ]: 1 recipient, no info         | 1, 2, and 3 | 1188                  | >0.01            | 1004  | 0.845      | [0.816, 0.870] |
|                                         |             |                       | >0.49            | 900   | 0.758      | [0.724, 0.788] |
|                                         |             |                       | >0.99            | 707   | 0.595      | [0.558, 0.631] |
|                                         |             |                       | >1.99            | 476   | 0.401      | [0.365, 0.438] |
|                                         |             |                       | >2.99            | 248   | 0.209      | [0.180, 0.241] |
| [30, $N$ ]: 30 recipients, no info      | 1, 2, and 3 | 1188                  | >0.01            | 1034  | 0.870      | [0.843, 0.894] |
|                                         |             |                       | >0.49            | 936   | 0.788      | [0.756, 0.817] |
|                                         |             |                       | >0.99            | 769   | 0.647      | [0.611, 0.682] |
|                                         |             |                       | >1.99            | 533   | 0.449      | [0.412, 0.486] |
|                                         |             |                       | >2.99            | 343   | 0.289      | [0.256, 0.324] |
| [1, $F$ ]: 1 recipient, full info       | 1, 2, and 3 | 1188                  | >0.01            | 1082  | 0.911      | [0.887, 0.930] |
|                                         |             |                       | >0.49            | 1022  | 0.860      | [0.832, 0.884] |
|                                         |             |                       | >0.99            | 902   | 0.759      | [0.726, 0.790] |
|                                         |             |                       | >1.99            | 717   | 0.604      | [0.566, 0.639] |
|                                         |             |                       | >2.99            | 501   | 0.422      | [0.385, 0.459] |
| [1, $P$ ]: 1 recipient, partial info    | 1 only      | 413                   | >0.01            | 379   | 0.918      | [0.875, 0.947] |
|                                         |             |                       | >0.49            | 355   | 0.860      | [0.809, 0.898] |
|                                         |             |                       | >0.99            | 302   | 0.731      | [0.672, 0.784] |
|                                         |             |                       | >1.99            | 218   | 0.528      | [0.465, 0.590] |
|                                         |             |                       | >2.99            | 151   | 0.366      | [0.307, 0.428] |
| [30, $F$ ]: 30 recipients, full info    | 2 only      | 420                   | >0.01            | 375   | 0.893      | [0.847, 0.926] |
|                                         |             |                       | >0.49            | 359   | 0.855      | [0.805, 0.894] |
|                                         |             |                       | >0.99            | 309   | 0.736      | [0.677, 0.787] |
|                                         |             |                       | >1.99            | 244   | 0.581      | [0.518, 0.641] |
|                                         |             |                       | >2.99            | 163   | 0.388      | [0.329, 0.451] |
| [1, $F'$ ]: 1 recipient, alt. full info | 3 only      | 355                   | >0.01            | 328   | 0.924      | [0.879, 0.954] |
|                                         |             |                       | >0.49            | 304   | 0.856      | [0.801, 0.898] |
|                                         |             |                       | >0.99            | 264   | 0.744      | [0.680, 0.799] |
|                                         |             |                       | >1.99            | 205   | 0.577      | [0.509, 0.643] |
|                                         |             |                       | >2.99            | 140   | 0.394      | [0.330, 0.463] |

Notes: Confidence intervals are Agresti-Coull binomial intervals.

**Table A.8** Changes in Data Market Participation Across Conditions

| Group                           | Individuals | Condition       | Exits | Enters | Proportion | 99% CI           |
|---------------------------------|-------------|-----------------|-------|--------|------------|------------------|
| [1, <i>N</i> ] Participants     | 940         | [1, <i>N</i> ]  | 0     |        | 0.000      | [0.000, 0.000]   |
|                                 |             | [30, <i>N</i> ] | 121   |        | 0.129      | [0.103, 0.160]   |
|                                 |             | [1, <i>F</i> ]  | 270   |        | 0.287      | [0.251, 0.327]   |
| [1, <i>N</i> ] Nonparticipants  | 248         | [1, <i>N</i> ]  |       | 0      | 0.000      | [0.000, 0.000]   |
|                                 |             | [30, <i>N</i> ] |       | 26     | 0.105      | [0.064, 0.160]   |
|                                 |             | [1, <i>F</i> ]  |       | 17     | 0.069      | [0.036, 0.327]   |
| [30, <i>N</i> ] Participants    | 845         | [1, <i>N</i> ]  | 26    |        | 0.031      | [0.018, 0.051]   |
|                                 |             | [30, <i>N</i> ] | 0     |        | 0.000      | [0.000, 0.000]   |
|                                 |             | [1, <i>F</i> ]  | 212   |        | 0.251      | [0.214, 0.291]   |
| [30, <i>N</i> ] Nonparticipants | 343         | [1, <i>N</i> ]  |       | 121    | 0.353      | [0.290, 0.422]   |
|                                 |             | [30, <i>N</i> ] |       | 0      | 0.000      | [0.000, 0.000]   |
|                                 |             | [1, <i>F</i> ]  |       | 54     | 0.157      | [0.113, 0.215]   |
| [1, <i>F</i> ] Participants     | 687         | [1, <i>N</i> ]  | 17    |        | 0.025      | [0.013, 0.046]   |
|                                 |             | [30, <i>N</i> ] | 54    |        | 0.079      | [0.056, 0.110]   |
|                                 |             | [1, <i>F</i> ]  | 0     |        | 0.000      | [0.000, 0.000]   |
| [1, <i>F</i> ] Nonparticipants  | 501         | [1, <i>N</i> ]  |       | 270    | 0.539      | [0.481, 0.595]   |
|                                 |             | [30, <i>N</i> ] |       | 212    | 0.423      | [0.368, 0.481]   |
|                                 |             | [1, <i>F</i> ]  |       | 0      | 0.000      | [0.000, 0.000]   |
| [1, <i>P</i> ] Participants     | 262         | [1, <i>N</i> ]  | 7     |        | 0.0267     | [0.0082, 0.0686] |
|                                 |             | [30, <i>N</i> ] | 26    |        | 0.0992     | [0.0601, 0.1581] |
|                                 |             | [1, <i>P</i> ]  | 0     |        | 0.0000     | [0.0000, 0.0000] |
|                                 |             | [1, <i>F</i> ]  | 48    |        | 0.1832     | [0.1292, 0.2528] |
| [1, <i>P</i> ] Nonparticipants  | 151         | [1, <i>N</i> ]  |       | 65     | 0.4305     | [0.3317, 0.5351] |
|                                 |             | [30, <i>N</i> ] |       | 50     | 0.3311     | [0.2412, 0.4353] |
|                                 |             | [1, <i>P</i> ]  |       | 0      | 0.0000     | [0.0000, 0.0000] |
|                                 |             | [1, <i>F</i> ]  |       | 12     | 0.0795     | [0.0364, 0.1579] |
| [30, <i>F</i> ] Participants    | 257         | [1, <i>N</i> ]  | 7     |        | 0.0272     | [0.0084, 0.0699] |
|                                 |             | [30, <i>N</i> ] | 10    |        | 0.0389     | [0.0158, 0.0853] |
|                                 |             | [1, <i>F</i> ]  | 13    |        | 0.0506     | [0.0237, 0.1001] |
|                                 |             | [30, <i>F</i> ] | 0     |        | 0.0000     | [0.0000, 0.0000] |
| [30, <i>F</i> ] Nonparticipants | 163         | [1, <i>N</i> ]  |       | 96     | 0.5890     | [0.4880, 0.6829] |
|                                 |             | [30, <i>N</i> ] |       | 72     | 0.4417     | [0.3457, 0.5423] |
|                                 |             | [1, <i>F</i> ]  |       | 20     | 0.1227     | [0.0694, 0.2056] |
|                                 |             | [30, <i>F</i> ] |       | 0      | 0.0000     | [0.0000, 0.0000] |
| [1, <i>F'</i> ] Participants    | 215         | [1, <i>N</i> ]  | 4     |        | 0.0186     | [0.0021, 0.0639] |
|                                 |             | [30, <i>N</i> ] | 22    |        | 0.1023     | [0.0592, 0.1693] |
|                                 |             | [1, <i>F'</i> ] | 0     |        | 0.0000     | [0.0000, 0.0000] |
|                                 |             | [1, <i>F</i> ]  | 29    |        | 0.1349     | [0.0848, 0.2069] |
| [1, <i>F'</i> ] Nonparticipants | 140         | [1, <i>N</i> ]  |       | 63     | 0.4500     | [0.3464, 0.5581] |
|                                 |             | [30, <i>N</i> ] |       | 47     | 0.3357     | [0.2422, 0.4441] |
|                                 |             | [1, <i>F'</i> ] |       | 0      | 0.0000     | [0.0000, 0.0000] |
|                                 |             | [1, <i>F</i> ]  |       | 11     | 0.0786     | [0.0345, 0.1608] |

*Notes:* This table summarizes changes in individuals' data-sharing behavior (i.e., entry into and exit from a data market) between two conditions. For example, 28.7% of the subjects willing to participate in the data market under [1, *N*] exited the data market under [1, *F*]. The confidence intervals are Agresti-Coull binomial intervals.

**Table A.9 Attitudes on Data Privacy, Ownership, Access, and Usage.**

| Label and Description                                                                                 | Agree |      | ...  |     | Disagree |      | NAs  |     |
|-------------------------------------------------------------------------------------------------------|-------|------|------|-----|----------|------|------|-----|
|                                                                                                       | 1     | 2    | 3    | 4   | 5        | 6    | 7    |     |
| <b>Privacy</b>                                                                                        |       |      |      |     |          |      |      |     |
| "I am concerned about my data privacy when ...                                                        |       |      |      |     |          |      |      |     |
| ... I can be personally identified."                                                                  | 55.1  | 25.7 | 11.4 | 2.9 | 2.4      | 1.3  | 1.2  | 0.0 |
| ... others can easily access my information (i.e. it is unsecure)."                                   | 56.2  | 25.6 | 10.4 | 2.8 | 1.7      | 2.1  | 1.2  | 0.0 |
| ... others can use my information for their own purposes."                                            | 46.5  | 26.6 | 13.9 | 5.6 | 4.0      | 2.1  | 1.3  | 0.0 |
| ... my information is highly sensitive."                                                              | 76.5  | 14.4 | 3.9  | 2.3 | 1.2      | 0.9  | 0.8  | 0.0 |
| <b>Ownership</b>                                                                                      |       |      |      |     |          |      |      |     |
| "I believe I should be able to ...                                                                    |       |      |      |     |          |      |      |     |
| ... choose who I share my data with."                                                                 | 65.5  | 24.9 | 5.5  | 2.2 | 0.8      | 0.5  | 0.5  | 0.2 |
| ... exclude others from accessing my data."                                                           | 60.3  | 26.3 | 7.6  | 2.8 | 1.8      | 0.7  | 0.5  | 0.1 |
| ... retract my data after I have shared it."                                                          | 48.1  | 24.4 | 11.6 | 6.8 | 5.1      | 2.5  | 1.2  | 0.2 |
| <b>Sharing</b>                                                                                        |       |      |      |     |          |      |      |     |
| "If I share my personal data with a third party, I believe they should be able to ...                 |       |      |      |     |          |      |      |     |
| ... use my data for their own purposes."                                                              | 9.3   | 24.4 | 21.9 | 9.8 | 9.8      | 10.8 | 13.7 | 0.3 |
| ... use my data to make money."                                                                       | 4.9   | 10.6 | 15.2 | 9.9 | 14.2     | 16.9 | 28.1 | 0.1 |
| ... sell my data to another party."                                                                   | 3.5   | 4.7  | 6.5  | 5.6 | 12.6     | 22.6 | 44.4 | 0.2 |
| <b>Expectations</b>                                                                                   |       |      |      |     |          |      |      |     |
| "When I share my personal data with a business, I expect that they will ...                           |       |      |      |     |          |      |      |     |
| ... use my data to understand me better as a customer."                                               | 34.0  | 42.0 | 16.1 | 3.5 | 1.5      | 1.6  | 1.3  | 0.0 |
| ... use the information to provide better products and services to me."                               | 34.0  | 39.6 | 16.6 | 4.4 | 2.5      | 1.5  | 1.3  | 0.0 |
| ... sell my data to other businesses."                                                                | 11.4  | 14.3 | 15.1 | 8.1 | 11.5     | 17.5 | 22.1 | 0.0 |
| ... use my data to understand whether I would be willing to pay more for their products or services." | 23.4  | 37.1 | 19.3 | 7.7 | 5.6      | 3.9  | 3.1  | 0.0 |

Notes: All values are percentages of the total sample. 1=Strongly agree, ..., 7=Strongly disagree.

## B. Experimental and Survey Design

**Figure B.1 Information on Self-Assessment Scores**

**Thank you for completing your self-assessment!**  
Based on your responses, your core personality has been measured across five factors: Extraversion, Agreeableness, Conscientiousness, Emotional Stability, and Intellect. Each factor score is measured on a scale from 10 to 50.

| First Name | Last Name | Extraversion | Agreeableness | Conscientiousness | Emotional Stability | Intellect |
|------------|-----------|--------------|---------------|-------------------|---------------------|-----------|
| Jane       | Doe       | 19           | 30            | 31                | 42                  | 48        |

Notes: Each factor is measured on a scale from 10 to 50.

The 50-item questionnaire you completed is a widely used personality measure based on the Five Factor Model. Extensive research has been done to relate these questions to behavioral and psychological phenomena. The Five-Factors (or “Big 5”) are set of essential traits fundamental to your core personality. Each trait is measured across a spectrum of extremes. For example, a low score on extraversion would mean high introversion.

- **Extraversion (or surgency):** Measures assertive, energetic, or outgoing behaviors. A high score indicates high extraversion, and a low score indicates low extraversion.
- **Agreeableness:** Measures empathy, sympathy, and kindness. A low score indicates low agreeableness, and a high score indicates high agreeableness.
- **Conscientiousness:** Measures your sense of responsibility, duty, and foresight. A low score indicates low conscientiousness, and a high score indicates high conscientiousness.
- **Emotional stability (or neuroticism):** Measures irritability and moodiness. High scores indicate high emotional stability (low neuroticism), low scores indicate low emotional stability (high neuroticism).
- **Intellect (or imagination):** Measures inquisitiveness, openness to new experience, thoughtfulness, and propensity for intellectually challenging tasks. High scores indicate high intellect.

**Figure B.2 Instruction Page Prior to Data-Sharing Choices.**

**You and all other participants in this study will be choosing whether to share personal data from this survey.** This data includes first name, last name, and self-assessment scores generated from the same quiz you just took (displayed in the table below).

| First Name | Last Name | Extraversion | Agreeableness | Conscientiousness | Emotional Stability | Intellect |
|------------|-----------|--------------|---------------|-------------------|---------------------|-----------|
| Jane       | Doe       | 19           | 31            | 21                | 42                  | 48        |

Over the next few pages, **you will be shown different possible scenarios for sharing this data.** Each scenario asks whether or not you would accept certain amounts of money for releasing your data. It is in your best interest to answer honestly, as **one of these scenarios will be randomly selected and made real.**

Any data you and other participants release will be sent together in an email to the recipient(s) approximately 1 week after the survey’s participation deadline.

When you are ready, please continue.

*Note.* The respondent’s name and score from their self-assessment are populated in the data table.

**Table B.1 Survey Text Used for Each Data-Sharing Condition**

| Condition  | Description                 | Survey Text                                                                                                                                                                                                                                                                                                           |
|------------|-----------------------------|-----------------------------------------------------------------------------------------------------------------------------------------------------------------------------------------------------------------------------------------------------------------------------------------------------------------------|
| [1, $N$ ]  | 1 recipient, no info        | “One participant is randomly selected to receive personal data released from you and other participants.”                                                                                                                                                                                                             |
| [30, $N$ ] | 30 recipients, no info      | “Thirty participants are randomly selected to receive personal data released from you and other participants.”                                                                                                                                                                                                        |
| [1, $P$ ]  | 1 recipient, partial info   | “One participant is randomly selected to receive personal data released from you and other participants. If this participant has your data, they can use your data to make money. The more data they have from participants in this study, the more money they can make.”                                             |
| [1, $F$ ]  | 1 recipient, full info      | “One participant is randomly selected to receive personal data released from you and other participants. If this participant has your data, they can use your data to make money by selling it to a third party. The more data they have from participants in this study, the more money they can make.”              |
| [1, $F'$ ] | 1 recipient, alt. full info | “One participant is randomly selected to receive personal data released from you and other participants. If this participant has your data, they can use your data to make money by selling it to another participant. The more data they have from participants in this study, the more money they can make.”        |
| [30, $F$ ] | 30 recipients, full info    | “Thirty participants are randomly selected to receive personal data released from you and other participants. If these participants have your data, they can each use your data to make money by selling it to a third party. The more data they have from participants in this study, the more money they can make.” |

**Table B.2 Randomization Group and Condition Orders**

| Sample | Group | Conditions (in order) |            |            |            |
|--------|-------|-----------------------|------------|------------|------------|
|        |       | $t = 1$               | $t = 2$    | $t = 3$    | $t = 4$    |
| 1      | 1     | [30, $N$ ]            | [1, $N$ ]  | [1, $P$ ]  | [1, $F$ ]  |
| 1      | 2     | [1, $N$ ]             | [30, $N$ ] | [1, $F$ ]  | [1, $P$ ]  |
| 1      | 3     | [1, $P$ ]             | [1, $F$ ]  | [30, $N$ ] | [1, $N$ ]  |
| 1      | 4     | [1, $F$ ]             | [1, $P$ ]  | [1, $N$ ]  | [30, $N$ ] |
| 2      | 5     | [30, $N$ ]            | [1, $N$ ]  | [30, $F$ ] | [1, $F$ ]  |
| 2      | 6     | [1, $N$ ]             | [30, $N$ ] | [1, $F$ ]  | [30, $F$ ] |
| 2      | 7     | [30, $F$ ]            | [1, $F$ ]  | [30, $N$ ] | [1, $N$ ]  |
| 2      | 8     | [1, $F$ ]             | [30, $F$ ] | [1, $N$ ]  | [30, $N$ ] |
| 3      | 9     | [30, $N$ ]            | [1, $N$ ]  | [1, $F'$ ] | [1, $F$ ]  |
| 3      | 10    | [1, $N$ ]             | [30, $N$ ] | [1, $F$ ]  | [1, $F'$ ] |
| 3      | 11    | [1, $F'$ ]            | [1, $F$ ]  | [30, $N$ ] | [1, $N$ ]  |
| 3      | 12    | [1, $F$ ]             | [1, $F'$ ] | [1, $N$ ]  | [30, $N$ ] |

**Figure B.3 Survey Question for Eliciting Reservation Prices for Data Sharing**

For each of the possible prices below, please indicate whether you would ‘accept’ and release your data, or ‘not accept’ and not release your data.

|        | <b>I would accept</b> | <b>I would not accept</b> |
|--------|-----------------------|---------------------------|
| \$0.01 | <input type="radio"/> | <input type="radio"/>     |
| \$0.49 | <input type="radio"/> | <input type="radio"/>     |
| \$0.99 | <input type="radio"/> | <input type="radio"/>     |
| \$1.99 | <input type="radio"/> | <input type="radio"/>     |
| \$2.99 | <input type="radio"/> | <input type="radio"/>     |

If this scenario is made real, the computer will choose one of the prices. If you selected ‘I would accept’ at that price, then we will release your data (under this scenario’s conditions), and you will earn the price. If you selected ‘I would not accept’ at that price, then we will not release your data, and you will not earn the price.

**Figure B.4 Advertised Study**

| Study Information                                                                                                                                                                           | Approved?                                                                                           | View                                                                                |
|---------------------------------------------------------------------------------------------------------------------------------------------------------------------------------------------|-----------------------------------------------------------------------------------------------------|-------------------------------------------------------------------------------------|
| <p><b>How well do you know yourself? An economic decision study</b><br/> <small>(Amazon gift cards) (Online Study) Seeking participants for an online study on decision making.</small></p> | <p> Approved</p> | <ul style="list-style-type: none"> <li>• Study Info</li> <li>• Timeslots</li> </ul> |

**Figure B.5 Information Page for Registered Study Participants.****How well do you know yourself? An economic decision study**Information Page

Thank you for your interest in participating in an economic decision study. You are now registered to participate in this study as part of the Debra Paget and Jeffrey Berg Business Simulation Laboratory (“The Lab”), which is a Cornell University Institutional Review Board for Human Participants (IRB) approved recruitment system.

This webpage is NOT the study’s survey. **Approximately 3 days before the participation deadline, you will be sent a personal email to participate in the study.** It will be an online survey, and it will take approximately 15 minutes to complete (but plan for a 20 minute period to review the consent form and/or provide [optional] feedback to the researcher).

If at any point you no longer wish to participate in this study, we encourage you to cancel your registration (through the Sona System) at least 4 days before the end of the participation deadline, so that others might be able to sign-up for the study.

[OPTIONAL] Questions?

If you have any questions or concerns prior to receiving the link to the study (which will be sent out **3 days** before the participation deadline), please feel free to send a note in the form below. The researcher will respond as soon as possible.

[OPTIONAL] Reply back email (required for a response back to any questions you submit above):

**Figure B.6 Informed Consent Form.**

**Online Consent Form for the Experimental Study “How well do you know yourself?”**

**Background Information:** You are invited to participate in a research study about how individuals and groups of individuals make decisions in a variety of economic contexts. We request that you read the information on this page carefully before agreeing to be in the study. You were selected as a possible participant because you are a part of the Debra Paget and Jeffrey Berg Business Simulation Laboratory (“The Lab”), which is a Cornell University Institutional Review Board for Human Participants (IRB) approved recruitment system.

**Procedures and Compensation:** This survey will last approximately 15-20 minutes, and you will answer a variety of economic questions and take a self-assessment on your personality. After the data collection period for this study, you will receive any earnings you’ve gained in the form of an electronic Amazon gift card, delivered to the email address you used to register for this study. If the survey states you have earned a certain amount of money, then this is real money that will be added towards your gift card. You will be paid \$2 for just participating in this study (once you acknowledge this information). Then, depending on your decisions in the economic questions only, you can earn additional money. Your earnings will not depend on your self-assessment results or any personal information.

**Voluntary Nature of Participation:** Your participation in this study is strictly voluntary. At any point in this survey, you may leave and discontinue participation.

**Risks and Benefits of Participating in the Study:** The risk for participating in this experiment is minimal. You have no greater physical, financial, or psychological risk from the experiment than you would from doing a similar amount of routine paperwork or computer-based activity in any Cornell University classroom. There are no substantial benefits to you from the research, other than the money you will earn by participating. If you are a registered student at Cornell University, there will be no extra-credit or class credit given for participating in this experiment, and your results from the experiment will not impact your performance in any class. By learning more about people’s decision-making, we hope that the research will benefit society by helping economic institutions understand people’s behavior.

**Confidentiality:** All decisions during the experiment can be kept confidential should you choose to remain anonymous. Should you choose to participate in the study, you will have the voluntary choice to reveal some of your decisions to other participants in this study, including your first and last name. However, your email, education, age, sex, and any other personal identifying information will be kept strictly confidential. Please note that if you were recruited for this experiment via e-mail there is a chance that the information you communicated could be read by a third party. De-identified data from this study may be shared with the research community at large to advance science and health. We will remove or code any personal information that could identify you before files are shared with other researchers to ensure that, by current scientific standards and known methods, no one will be able to identify you from the information we share. Despite these measures, we cannot guarantee anonymity of your personal data.

**Contacts and Questions:** After the experiment, Zhouyu Wu (zw369@cornell.edu; [REDACTED]-[REDACTED]-[REDACTED]) will be glad to answer any questions that you may have. You may contact the Cornell University Institutional Review Board for Human Participants (IRB) at 607-255-6182. The Cornell University IRB website is <http://www.irb.cornell.edu>. You may also report your concerns or complaints anonymously through Ethicspoint online at [www.hotline.cornell.edu](http://www.hotline.cornell.edu) or by calling toll free at 1-866-293-3077. Ethicspoint is an independent organization that serves as a liaison between the University and the person bringing the complaint so that anonymity can be ensured.

- I understand the information above and agree to participate in this study.**
- I am 18 years old or older.**

*This consent form was approved by IRB on August 27, 2018.*

**Figure B.7 Self-Assessment Questions**

On the next page you will take a self-assessment, based on 50 statements. These statements will be spread out over 5 pages. Read all statements with careful consideration and determine how accurately these statements describe yourself.

Your responses for each statement will NOT determine your earnings in this study.

NEXT →

----- Page Break -----

**Part 1 of 5**

|                                                 | Very<br>Inaccurate    | Moderately<br>Inaccurate | Neither<br>Accurate<br>Nor<br>Inaccurate | Moderately<br>Accurate | Very<br>Accurate      |
|-------------------------------------------------|-----------------------|--------------------------|------------------------------------------|------------------------|-----------------------|
| I am the life of the party.                     | <input type="radio"/> | <input type="radio"/>    | <input type="radio"/>                    | <input type="radio"/>  | <input type="radio"/> |
| I feel little concern for others.               | <input type="radio"/> | <input type="radio"/>    | <input type="radio"/>                    | <input type="radio"/>  | <input type="radio"/> |
| I am always prepared.                           | <input type="radio"/> | <input type="radio"/>    | <input type="radio"/>                    | <input type="radio"/>  | <input type="radio"/> |
| I get stressed out easily.                      | <input type="radio"/> | <input type="radio"/>    | <input type="radio"/>                    | <input type="radio"/>  | <input type="radio"/> |
| I have a rich vocabulary.                       | <input type="radio"/> | <input type="radio"/>    | <input type="radio"/>                    | <input type="radio"/>  | <input type="radio"/> |
| I don't talk a lot.                             | <input type="radio"/> | <input type="radio"/>    | <input type="radio"/>                    | <input type="radio"/>  | <input type="radio"/> |
| I am interested in people.                      | <input type="radio"/> | <input type="radio"/>    | <input type="radio"/>                    | <input type="radio"/>  | <input type="radio"/> |
| I leave my belongings around.                   | <input type="radio"/> | <input type="radio"/>    | <input type="radio"/>                    | <input type="radio"/>  | <input type="radio"/> |
| I am relaxed most of the time.                  | <input type="radio"/> | <input type="radio"/>    | <input type="radio"/>                    | <input type="radio"/>  | <input type="radio"/> |
| I have difficulty understanding abstract ideas. | <input type="radio"/> | <input type="radio"/>    | <input type="radio"/>                    | <input type="radio"/>  | <input type="radio"/> |

NEXT →

----- Page Break -----

**Part 2 of 5**

|                                        | Very<br>Inaccurate    | Moderately<br>Inaccurate | Neither<br>Accurate<br>Nor<br>Inaccurate | Moderately<br>Accurate | Very<br>Accurate      |
|----------------------------------------|-----------------------|--------------------------|------------------------------------------|------------------------|-----------------------|
| I feel comfortable around people.      | <input type="radio"/> | <input type="radio"/>    | <input type="radio"/>                    | <input type="radio"/>  | <input type="radio"/> |
| I insult people.                       | <input type="radio"/> | <input type="radio"/>    | <input type="radio"/>                    | <input type="radio"/>  | <input type="radio"/> |
| I pay attention to details.            | <input type="radio"/> | <input type="radio"/>    | <input type="radio"/>                    | <input type="radio"/>  | <input type="radio"/> |
| I worry about things.                  | <input type="radio"/> | <input type="radio"/>    | <input type="radio"/>                    | <input type="radio"/>  | <input type="radio"/> |
| I have a vivid imagination.            | <input type="radio"/> | <input type="radio"/>    | <input type="radio"/>                    | <input type="radio"/>  | <input type="radio"/> |
| I keep in the background.              | <input type="radio"/> | <input type="radio"/>    | <input type="radio"/>                    | <input type="radio"/>  | <input type="radio"/> |
| I sympathize with others' feelings.    | <input type="radio"/> | <input type="radio"/>    | <input type="radio"/>                    | <input type="radio"/>  | <input type="radio"/> |
| I make a mess of things.               | <input type="radio"/> | <input type="radio"/>    | <input type="radio"/>                    | <input type="radio"/>  | <input type="radio"/> |
| I seldom feel blue.                    | <input type="radio"/> | <input type="radio"/>    | <input type="radio"/>                    | <input type="radio"/>  | <input type="radio"/> |
| I am not interested in abstract ideas. | <input type="radio"/> | <input type="radio"/>    | <input type="radio"/>                    | <input type="radio"/>  | <input type="radio"/> |

NEXT →

----- Page Break -----

**Figure B.8 Self-Assessment Questions (Cont'd.)**

|                                                          | Very Inaccurate       | Moderately Inaccurate | Neither Accurate Nor Inaccurate | Moderately Accurate   | Very Accurate                         |
|----------------------------------------------------------|-----------------------|-----------------------|---------------------------------|-----------------------|---------------------------------------|
| <b>Part 3 of 5</b>                                       |                       |                       |                                 |                       |                                       |
| I start conversations.                                   | <input type="radio"/> | <input type="radio"/> | <input type="radio"/>           | <input type="radio"/> | <input type="radio"/>                 |
| I am not interested in other people's problems           | <input type="radio"/> | <input type="radio"/> | <input type="radio"/>           | <input type="radio"/> | <input type="radio"/>                 |
| I get chores done right away.                            | <input type="radio"/> | <input type="radio"/> | <input type="radio"/>           | <input type="radio"/> | <input type="radio"/>                 |
| I am easily disturbed.                                   | <input type="radio"/> | <input type="radio"/> | <input type="radio"/>           | <input type="radio"/> | <input type="radio"/>                 |
| I have excellent ideas.                                  | <input type="radio"/> | <input type="radio"/> | <input type="radio"/>           | <input type="radio"/> | <input type="radio"/>                 |
| I have little to say.                                    | <input type="radio"/> | <input type="radio"/> | <input type="radio"/>           | <input type="radio"/> | <input type="radio"/>                 |
| I have a soft heart.                                     | <input type="radio"/> | <input type="radio"/> | <input type="radio"/>           | <input type="radio"/> | <input type="radio"/>                 |
| I often forget to put things back in their proper place. | <input type="radio"/> | <input type="radio"/> | <input type="radio"/>           | <input type="radio"/> | <input type="radio"/>                 |
| I get upset easily.                                      | <input type="radio"/> | <input type="radio"/> | <input type="radio"/>           | <input type="radio"/> | <input type="radio"/>                 |
| I do not have a good imagination.                        | <input type="radio"/> | <input type="radio"/> | <input type="radio"/>           | <input type="radio"/> | <input type="radio"/>                 |
|                                                          |                       |                       |                                 |                       | <input type="button" value="NEXT →"/> |
| ----- Page Break -----                                   |                       |                       |                                 |                       |                                       |
| <b>Part 4 of 5</b>                                       |                       |                       |                                 |                       |                                       |
|                                                          | Very Inaccurate       | Moderately Inaccurate | Neither Accurate Nor Inaccurate | Moderately Accurate   | Very Accurate                         |
| I talk to a lot of different people at parties.          | <input type="radio"/> | <input type="radio"/> | <input type="radio"/>           | <input type="radio"/> | <input type="radio"/>                 |
| I am not really interested in others.                    | <input type="radio"/> | <input type="radio"/> | <input type="radio"/>           | <input type="radio"/> | <input type="radio"/>                 |
| I like order.                                            | <input type="radio"/> | <input type="radio"/> | <input type="radio"/>           | <input type="radio"/> | <input type="radio"/>                 |
| I change my mood a lot.                                  | <input type="radio"/> | <input type="radio"/> | <input type="radio"/>           | <input type="radio"/> | <input type="radio"/>                 |
| I am quick to understand things.                         | <input type="radio"/> | <input type="radio"/> | <input type="radio"/>           | <input type="radio"/> | <input type="radio"/>                 |
| I don't like to draw attention to myself.                | <input type="radio"/> | <input type="radio"/> | <input type="radio"/>           | <input type="radio"/> | <input type="radio"/>                 |
| I take time out for others.                              | <input type="radio"/> | <input type="radio"/> | <input type="radio"/>           | <input type="radio"/> | <input type="radio"/>                 |
| I shirk my duties.                                       | <input type="radio"/> | <input type="radio"/> | <input type="radio"/>           | <input type="radio"/> | <input type="radio"/>                 |
| I have frequent mood swings.                             | <input type="radio"/> | <input type="radio"/> | <input type="radio"/>           | <input type="radio"/> | <input type="radio"/>                 |
| I use difficult words.                                   | <input type="radio"/> | <input type="radio"/> | <input type="radio"/>           | <input type="radio"/> | <input type="radio"/>                 |
|                                                          |                       |                       |                                 |                       | <input type="button" value="NEXT →"/> |
| ----- Page Break -----                                   |                       |                       |                                 |                       |                                       |
| <b>Part 5 of 5</b>                                       |                       |                       |                                 |                       |                                       |
|                                                          | Very Inaccurate       | Moderately Inaccurate | Neither Accurate Nor Inaccurate | Moderately Accurate   | Very Accurate                         |
| I don't mind being the center of attention.              | <input type="radio"/> | <input type="radio"/> | <input type="radio"/>           | <input type="radio"/> | <input type="radio"/>                 |
| I feel others' emotions.                                 | <input type="radio"/> | <input type="radio"/> | <input type="radio"/>           | <input type="radio"/> | <input type="radio"/>                 |
| I follow a schedule.                                     | <input type="radio"/> | <input type="radio"/> | <input type="radio"/>           | <input type="radio"/> | <input type="radio"/>                 |
| I get irritated easily.                                  | <input type="radio"/> | <input type="radio"/> | <input type="radio"/>           | <input type="radio"/> | <input type="radio"/>                 |
| I spend time reflecting on things.                       | <input type="radio"/> | <input type="radio"/> | <input type="radio"/>           | <input type="radio"/> | <input type="radio"/>                 |
| I am quiet around strangers.                             | <input type="radio"/> | <input type="radio"/> | <input type="radio"/>           | <input type="radio"/> | <input type="radio"/>                 |
| I make people feel at ease.                              | <input type="radio"/> | <input type="radio"/> | <input type="radio"/>           | <input type="radio"/> | <input type="radio"/>                 |
| I am exacting in my work.                                | <input type="radio"/> | <input type="radio"/> | <input type="radio"/>           | <input type="radio"/> | <input type="radio"/>                 |
| I often feel blue.                                       | <input type="radio"/> | <input type="radio"/> | <input type="radio"/>           | <input type="radio"/> | <input type="radio"/>                 |
| I am full of ideas.                                      | <input type="radio"/> | <input type="radio"/> | <input type="radio"/>           | <input type="radio"/> | <input type="radio"/>                 |
|                                                          |                       |                       |                                 |                       | <input type="button" value="NEXT →"/> |

Figure B.9 Data and Monetization Delivery to Data Recipients.

Cornell

Joy Z. Wu &lt;zw369@cornell.edu&gt;

**Data from "How well do you know yourself?"**

1 message

Joy Wu &lt;zw369@cornell.edu&gt;

Thu, Jun 4, 2020 at 12:32 AM

To: Undisclosed Recipients &lt;zw369@cornell.edu&gt;

Bcc: [REDACTED]

Hello,

You have been randomly selected by the "How well do you know yourself?" survey through the Johnson Business Simulation Lab. The survey has selected you to receive personal data shared by other participants in the study. This data you have received was entered into a hypothetical market to be exploited for money. You have earned an additional \$4 from this data, which has been reflected in your participant earnings.

| First Name | Last Name  | Extraversion | Agreeableness | Conscientiousness | Emotional Stability | Intellect |
|------------|------------|--------------|---------------|-------------------|---------------------|-----------|
| [REDACTED] | [REDACTED] | 40           | 28            | 35                | 27                  | 30        |
| [REDACTED] | [REDACTED] | 27           | 44            | 35                | 43                  | 41        |
| [REDACTED] | [REDACTED] | 30           | 37            | 33                | 35                  | 32        |
| [REDACTED] | [REDACTED] | 25           | 29            | 43                | 35                  | 36        |
| [REDACTED] | [REDACTED] | 27           | 30            | 35                | 27                  | 35        |
| [REDACTED] | [REDACTED] | 25           | 41            | 34                | 16                  | 38        |
| [REDACTED] | [REDACTED] | 40           | 41            | 40                | 31                  | 36        |
| [REDACTED] | [REDACTED] | 24           | 39            | 25                | 36                  | 34        |
| [REDACTED] | [REDACTED] | 16           | 37            | 26                | 26                  | 39        |
| [REDACTED] | [REDACTED] | 36           | 38            | 40                | 38                  | 41        |
| [REDACTED] | [REDACTED] | 44           | 43            | 42                | 40                  | 38        |
| [REDACTED] | [REDACTED] | 24           | 36            | 39                | 27                  | 35        |
| [REDACTED] | [REDACTED] | 26           | 36            | 23                | 25                  | 20        |
| [REDACTED] | [REDACTED] | 35           | 40            | 36                | 43                  | 27        |
| [REDACTED] | [REDACTED] | 21           | 30            | 30                | 45                  | 34        |
| [REDACTED] | [REDACTED] | 42           | 42            | 31                | 26                  | 41        |

*Note: You are not required to do anything upon receiving this data. We are sending you this information because the survey does not deceive participants about real choices and outcomes they face. Any decision participants make in our study is for real, unless it is explicitly stated to be hypothetical.*

*Note.* Redacted screenshot of subjects' psychometric data delivered via email to a recipient who received additional earnings from secondary data monetization.

**Table B.3 Survey Collection Details.**

| <b>Sample 1</b>  | <b>Wave 1</b>  | <b>Wave 2</b>  | <b>Wave 3</b>  | <b>Wave 4</b>  | <b>Total</b> |
|------------------|----------------|----------------|----------------|----------------|--------------|
| Dates (in 2019)  | 3/21-3/24      | 3/28-3/30      | 4/11-4/14      | 4/18-4/20      |              |
| Start day (time) | Thu (8:30 AM)  | Thu (10:09 AM) | Thu (11:31 AM) | Thu (8:55 AM)  |              |
| End day (time)   | Sat (11:59 PM) | Sat (11:59 PM) | Sat (11:59 PM) | Sat (11:59 PM) |              |
| # Available      | 200            | 100            | 200            | 100            | 600          |
| # Registered     | 200            | 26             | 156            | 91             | 473          |
| # Incompleted    | 0              | 1              | 0              | 2              | 3            |
| # Completed      | 187            | 18             | 128            | 80             | 413          |
| <b>Sample 2</b>  | <b>Wave 5</b>  | <b>Wave 6</b>  | <b>Wave 7</b>  | <b>Wave 8</b>  | <b>Total</b> |
| Dates (in 2019)  | 10/31-11/02    | 11/07-09       | 11/14-16       | 11/21-23       |              |
| Start day (time) | Thu (8:00 AM)  | Thu (8:00 AM)  | Thu (8:00 AM)  | Thu (8:00 AM)  |              |
| End day (time)   | Sat (11:59 PM) | Sat (11:59 PM) | Sat (11:59 PM) | Sat (11:59 PM) |              |
| # Available      | 200            | 100            | 200            | 100            | 600          |
| # Registered     | 200            | 100            | 147            | 69             | 516          |
| # Incompleted    | 0              | 0              | 3              | 3              | 6            |
| # Completed      | 170            | 87             | 113            | 50             | 420          |
| <b>Sample 3</b>  | <b>Wave 9</b>  | <b>Wave 10</b> | <b>Wave 11</b> | <b>Wave 12</b> | <b>Total</b> |
| Dates (in 2020)  | 5/21-23        | 5/28-30        | 6/4-6          | 6/11-13        |              |
| Start day (time) | Thu (8:00 AM)  | Thu (8:00 AM)  | Thu (8:00 AM)  | Thu (8:00 AM)  |              |
| End day (time)   | Sat (11:59 PM) | Sat (11:59 PM) | Sat (11:59 PM) | Sat (11:59 PM) |              |
| # Available      | 200            | 100            | 200            | 100            | 600          |
| # Registered     | 173            | 100            | 70             | 90             | 433          |
| # Incompleted    | 0              | 1              | 1              | 0              | 2            |
| # Completed      | 151            | 90             | 55             | 58             | 355          |

*Notes:* There were 1,188 completed responses in three samples spanning 16 months; each sample was conducted over four consecutive, weekly sessions. Registration was open between Sundays and Wednesdays prior to the start time of the survey. Email advertisements were sent out by the lab on Mondays. Incomplete (i.e., responses started but not completed) surveys did *not* receive payments and were removed from the data.
